# Supplementary material for: Genetic Diversity Analysis of Brassica Yellows Virus Causing Aberrant Color Symptoms in Oilseed Rape
Source: MDPI journal article supplement (doi:10.3390/plants12051008), 2023-02-23
Supplement: s1 [file s1]

Supplementary materilas

Supplementary Table S1. Correlation analysis between disease incidence and leaf colour value in five fields

| Disease<br>Incidence | G norm         |         | VI_green       |         |
|----------------------|----------------|---------|----------------|---------|
|                      | R <sup>2</sup> | p-value | R <sup>2</sup> | p-value |
| BrYV%                | 0.09           | 0.63    | 0.10           | 0.606   |
| TuMV%                | 0.01           | 0.882   | 0.01           | 0.899   |
| Virus                | 0.33           | 0.31    | 0.49           | 0.191   |

Supplementary Table S2. Full-length nucleotide sequences of 21 BrYV isolates, 55 TuYV isolates and 4 outgroup species (BWYV, BMYV, ToYV and PLRV) analyzed in this study.

| Host                         | Location  | Virus isolate    | Accession number |
|------------------------------|-----------|------------------|------------------|
| <i>Cicer arietinum</i>       | Australia | TuYV-MK111       | MT586573         |
| <i>Cicer arietinum</i>       | Australia | TuYV-5510        | MT586572         |
| <i>Brassica napus</i>        | Australia | TuYV-5514b       | MT586576         |
| <i>Lens culinaris</i>        | Australia | TuYV-L31_4       | MT586574         |
| <i>Pisum sativum</i>         | Australia | TuYV-P6_2        | MT586575         |
| <i>Cicer arietinum</i>       | Australia | TuYV-1740        | MT586571         |
| <i>Brassica oleracea</i>     | Australia | TuYV-MJ11-2      | LR584025         |
| <i>Cicer arietinum</i>       | Australia | TuYV-YK12-1      | LR584027         |
| <i>Brassica napus</i>        | Australia | TuYV-MK107       | MT586590         |
| <i>Brassica napus</i>        | Australia | TuYV-C2016a      | MT586585         |
| <i>Lens culinaris</i>        | Australia | TuYV-MK113       | MT586589         |
| <i>Brassica napus</i>        | Australia | TuYV-MK102       | MT586577         |
| <i>Sinapis arvensis</i>      | Australia | TuYV-5248        | MT586581         |
| <i>Brassica napus</i>        | Australia | TuYV-MK104       | MT586578         |
| <i>Pisum sativum</i>         | Australia | TuYV-P5_8        | MT586586         |
| <i>Cicer arietinum</i>       | Australia | TuYV-BL13-1      | LR584020         |
| <i>Brassica napus</i>        | Australia | TuYV-BG12-1      | LR584019         |
| <i>Brassica napus</i>        | Australia | TuYV-C21A        | MT586582         |
| <i>Pisum sativum</i>         | Australia | TuYV-MK109       | MT586579         |
| <i>Brassica napus</i>        | Australia | TuYV-5512b       | MT586580         |
| <i>Brassica napus</i>        | Australia | TuYV-WA-1_Canola | LR584021         |
| <i>Brassica napus</i>        | Australia | TuYV-MK106       | MT586584         |
| <i>Pisum sativum</i>         | Australia | TuYV-MK103       | MT586583         |
| <i>Brassica napus</i>        | Australia | TuYV-5509        | MT586587         |
| <i>Brassica napus</i>        | Australia | TuYV-C2016b      | MT586588         |
| <i>Raphanus raphanistrum</i> | Australia | TuYV-MJ11-3      | LR584026         |
| <i>Brassica napus</i>        | Australia | TuYV-C20A        | MT586597         |
| <i>Brassica oleracea</i>     | Australia | TuYV-MJ11-1      | LR584024         |
| <i>Beta vulgaris</i>         | Australia | TuYV-Br12        | MT586598         |
| <i>Brassica napus</i>        | Australia | TuYV-5514a       | MT586594         |
| <i>Brassica napus</i>        | Australia | TuYV-5513        | MT586592         |
| <i>Brassica napus</i>        | Australia | TuYV-5512a       | MT586593         |
| <i>Brassica napus</i>        | Australia | TuYV-5414        | MT586591         |
| <i>Brassica napus</i>        | Australia | TuYV-MK105       | MT586595         |
| <i>Diuris pendunculata</i>   | Australia | TuYV-WA-1        | JQ862472         |
| <i>Cicer arietinum</i>       | Australia | TuYV-5511        | MT586596         |
| <i>Chinese cabbage</i>       | China     | BrYV-C-Haidian   | KF015269         |
| <i>Raphanus sativus</i>      | China     | BrYV-CR          | JN015068         |
| <i>Brassica napus</i>        | China     | BrYV-BJS         | HQ388351         |
| <i>Brassica napus</i>        | China     | BrYV-China       | KY310572         |

|                              |              |                           |           |
|------------------------------|--------------|---------------------------|-----------|
| <i>Brassica napus</i>        | China        | BrYV-ABJ                  | NC_016038 |
| <i>Nicotiana tabacum</i>     | China        | BrYV-Anhui                | MF314820  |
| <i>Brassica campestris</i>   | China        | BrYV-AJS                  | HQ388350  |
| <i>Nicotiana tabacum</i>     | China        | BrYV-NtabQJ               | MK057527  |
| <i>Nicotiana tabacum</i>     | China        | TuYV-Anhui                | KR706247  |
| <i>Nicotiana tabacum</i>     | China        | ToYV-Shandong             | MK751486  |
| <i>Brassica napus</i>        | China        | BrYV-Inc                  | ON804808  |
| <i>Brassica napus</i>        | China        | BrYV-BBJ                  | HQ388349  |
| <i>Brassica napus</i>        | China        | BrYV-814NJLH              | ON804809  |
| <i>Brassica napus</i>        | China        | BrYV-NJ13                 | ON804810  |
| <i>Arachis pintoi</i>        | Colombia     | TuYV-Pintoi-VarA          | KU726090  |
| <i>Arachis pintoi</i>        | Colombia     | TuYV-Pintoi-VarB          | KU726091  |
| <i>Lactuca sativa</i>        | France       | TuYV-FL1                  | NC003743  |
| <i>Pisum sativum</i>         | Germany      | TuYV-Salzlandkreis-2_16   | MN497803  |
| <i>Pisum sativum</i>         | Germany      | TuYV-Kreis_Stormarn_16    | MN497808  |
| <i>Pisum sativum</i>         | Germany      | TuYV_Landkreis_Meissen_17 | MN497810  |
| <i>Pisum sativum</i>         | Germany      | TuYV-Muenster_17          | MN497806  |
| <i>Pisum sativum</i>         | Germany      | TuYV-Muenster_18          | MN497807  |
| <i>Pisum sativum</i>         | Germany      | TuYV-Salzlandkreis-2_18   | MN497804  |
| <i>Pisum sativum</i>         | Germany      | TuYV-Salzlandkreis-1_18   | MN497802  |
| <i>Pisum sativum</i>         | Germany      | TuYV-JKI_29344            | MK450520  |
| <i>Pisum sativum</i>         | Germany      | TuYV-Landkreis_Meissen_18 | MN497811  |
| <i>Pisum sativum</i>         | Germany      | TuYV-Salzlandkreis-1_17   | MN497801  |
| <i>Raphanus raphanistrum</i> | Germany      | TuYV-JKI_29345            | MK450519  |
| <i>Pisum sativum</i>         | Germany      | TuYV-Muenster_16          | MN497805  |
| <i>Pisum sativum</i>         | Germany      | TuYV-Salzlandkreis-1_16   | MN497800  |
| <i>Pisum sativum</i>         | Germany      | TuYV-Landkreis_Meissen_16 | MN497809  |
| <i>Raphanus sativus</i>      | Japan        | BrYV-R3b                  | LC428363  |
| <i>Brassica rapa</i>         | Japan        | BrYV-CC1                  | LC428358  |
| <i>Brassica oleracea</i>     | Japan        | BrYV-CD9                  | LC428362  |
| <i>Sinapis alba</i>          | Japan        | BrYV-WN1                  | LC428359  |
| <i>Brassica rapa</i>         | Japan        | BrYV-TO3                  | LC428360  |
| <i>Raphanus sativus</i>      | Japan        | BrYV-R40                  | LC428365  |
| <i>Raphanus sativus</i>      | Japan        | BrYV-RT8                  | LC428364  |
| <i>Brassica napus</i>        | Japan        | BrYV-NAP                  | LC428361  |
| <i>Brassica oleracea</i>     | South_Africa | TuYV-Bo10/12              | KU198395  |
| <i>Chinese cabbage</i>       | South_Korea  | BrYV-CS                   | KF923236  |
| <i>Beta vulgaris</i>         | USA          | BWYV                      | NC_004756 |
| <i>Solanum tuberosum</i>     | USA          | PLRV                      | NC_001747 |
| <i>Beta vulgaris</i>         | USA          | BMVYV                     | NC_003491 |

Supplementary Table S3: Genetic distances calculated within groups of BrYV and TuYV isolates

| Method                                         | P-distance |
|------------------------------------------------|------------|
| Overall mean distance                          | 0.092      |
| Within groups mean distance: BrYV              | 0.049      |
| Within groups mean distance: TuYV              | 0.047      |
| Between groups mean distance: BrYV vs TuYV     | 0.0031     |
| Net between groups mean distance: BrYV vs TuYV | 0.0021     |

Supplementary Table S4. The primer sequences used in this study

| Primer name   | Sequence (5' → 3')       | Reference                  |
|---------------|--------------------------|----------------------------|
| BrYV 1F       | AGAAAAGAAACCAGGAGGGAATC  | In this study              |
| BrYV 1R       | AATGTTCTCCTCGGGTTGC      | In this study              |
| BrYV 2F       | CCCCGAAGCAGAACTAAAGA     | In this study              |
| BrYV 2R       | GGAAATCAAGCCCAACTCCA     | In this study              |
| BrYV 3F       | AGCGTGGACAGATCGTGATA     | In this study              |
| BrYV 3R       | GAGTGCCGTAGGGATTTCTC     | In this study              |
| CABYV AR 2299 | ACTACATGGTCACTAGCCTCCG   | In this study              |
| CABYV AR 2911 | AACAATCAACCTCGCTCACG     | In this study              |
| BWYV ST9 2017 | ACTGTCTGAGTAAAGCGGCAA    | In this study              |
| BWYV ST9 2449 | CCGGTGTATACGAGACTGGC     | In this study              |
| GMMV-2201     | AGTGGGACCATTAGCCTCG      | In this study              |
| GMMV-2900     | ATATGCCCTGGGATTCGTG      | In this study              |
| TuMV-F        | TGGCTGATTACGAAGTACG      | Wei <i>et al.</i> , 2013   |
| TuMV-R        | CTGCCTAAATGTGGGTTTGG     | Wei <i>et al.</i> , 2013   |
| TuYV-F        | AAGAGGCTTGCCCTTCCTG      | Zhang <i>et al.</i> , 2016 |
| TuYV-R        | AACCAAATCCGGTGTTGGAT     | Zhang <i>et al.</i> , 2016 |
| BrYA484F      | TACTTGGACTAGAGATGCTGAAAG | Zhang <i>et al.</i> , 2016 |
| BrY761R       | AGACCGAAGAGCTGAAAAGG     | Zhang <i>et al.</i> , 2016 |
| BrYB88F       | CCTCCACCCAAAACAAGTAT     | Zhang <i>et al.</i> , 2016 |
| BrYC257F      | CGAGTTTCCGTACTTGTTG      | Zhang <i>et al.</i> , 2016 |
| CMV-F         | TGTCCRACYGTBAGTAGGGT     | Zhang <i>et al.</i> , 2021 |
| CMV-R         | CGAAGAAACCTAGGAGATGG     | Zhang <i>et al.</i> , 2021 |
| CABYV-2715    | GACTGCTCCGGTTTTGACTGG    | Shang <i>et al.</i> , 2008 |
| CABYV-4100    | CGTCTACCTATTTCTGGGT      | Shang <i>et al.</i> , 2008 |

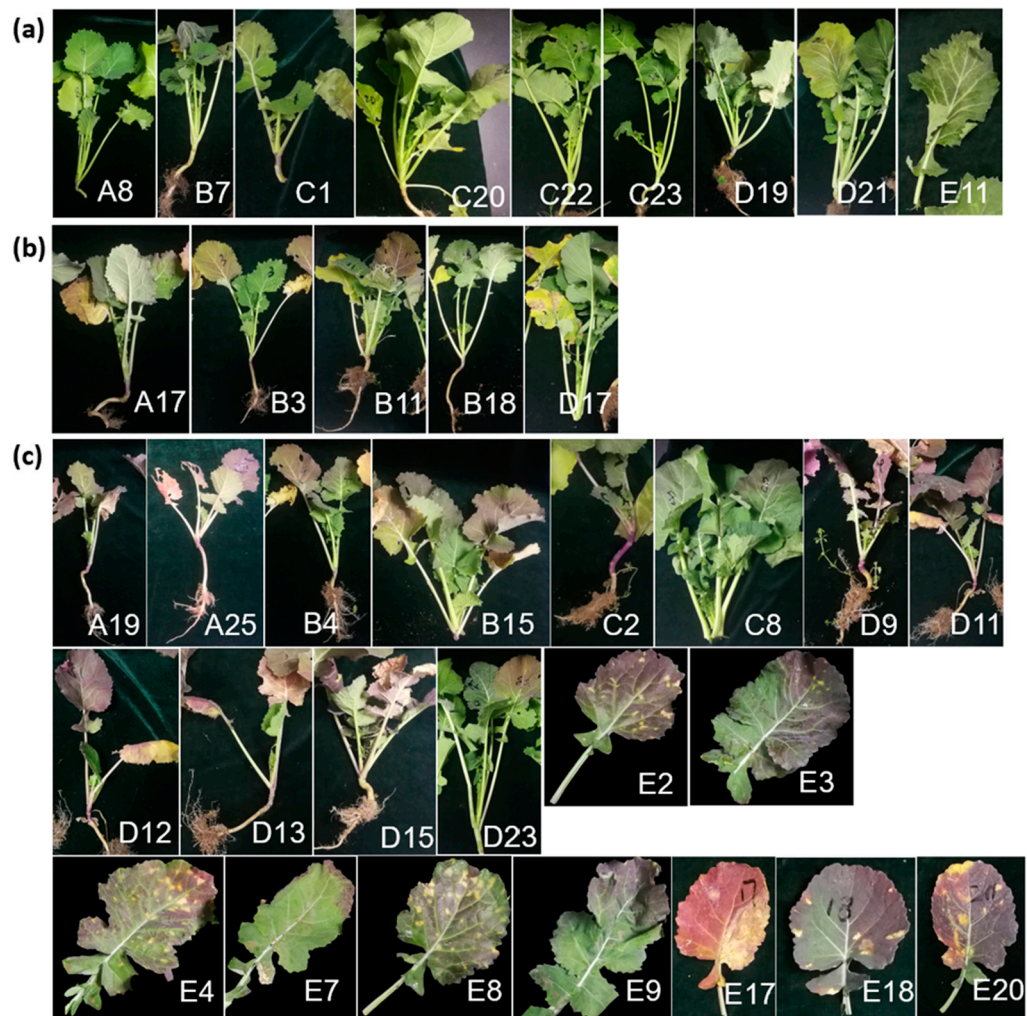

Supplementary Figure S1. Three types of plants with different symptoms after BrYV infecting in field on oilseed rape. (a) displayed the type I plants. These plants exhibited no significant symptoms. (b) was the BrYV infected plants with yellowing leaves in type II. (c) showed the type III BrYV positive plants with remarkable red or purple leaves. The block capitals A, B, C, D and E indicated different samples collected from corresponding fields.

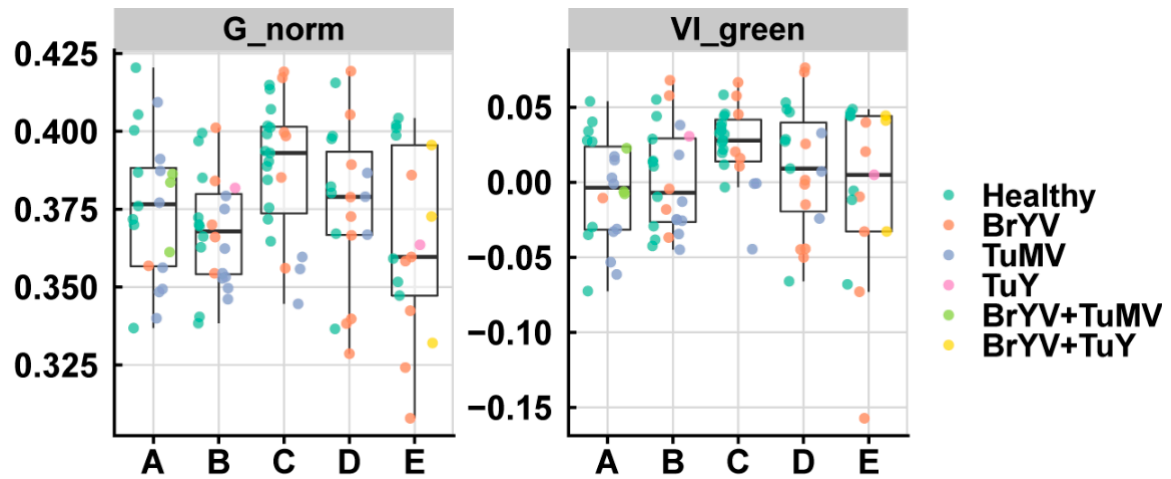

Supplementary Figure S2. The distribution of the leaf color value in five fields. Leaf color values were estimated by G\_norm (left) or VI\_green (right) parameters. Blue dots indicate healthy plant leaf color values. Orange, cornflowerblue and purple dots suggest the color value of BrYV, TuMV and TuYV infected plant, respectively. Green and yellow dots represent the leaf color values of co-infection of BrYV and TuMV, and BrYV and TuYV, respectively. The block capitals A, B, C, D and E indicated five sampling fields.



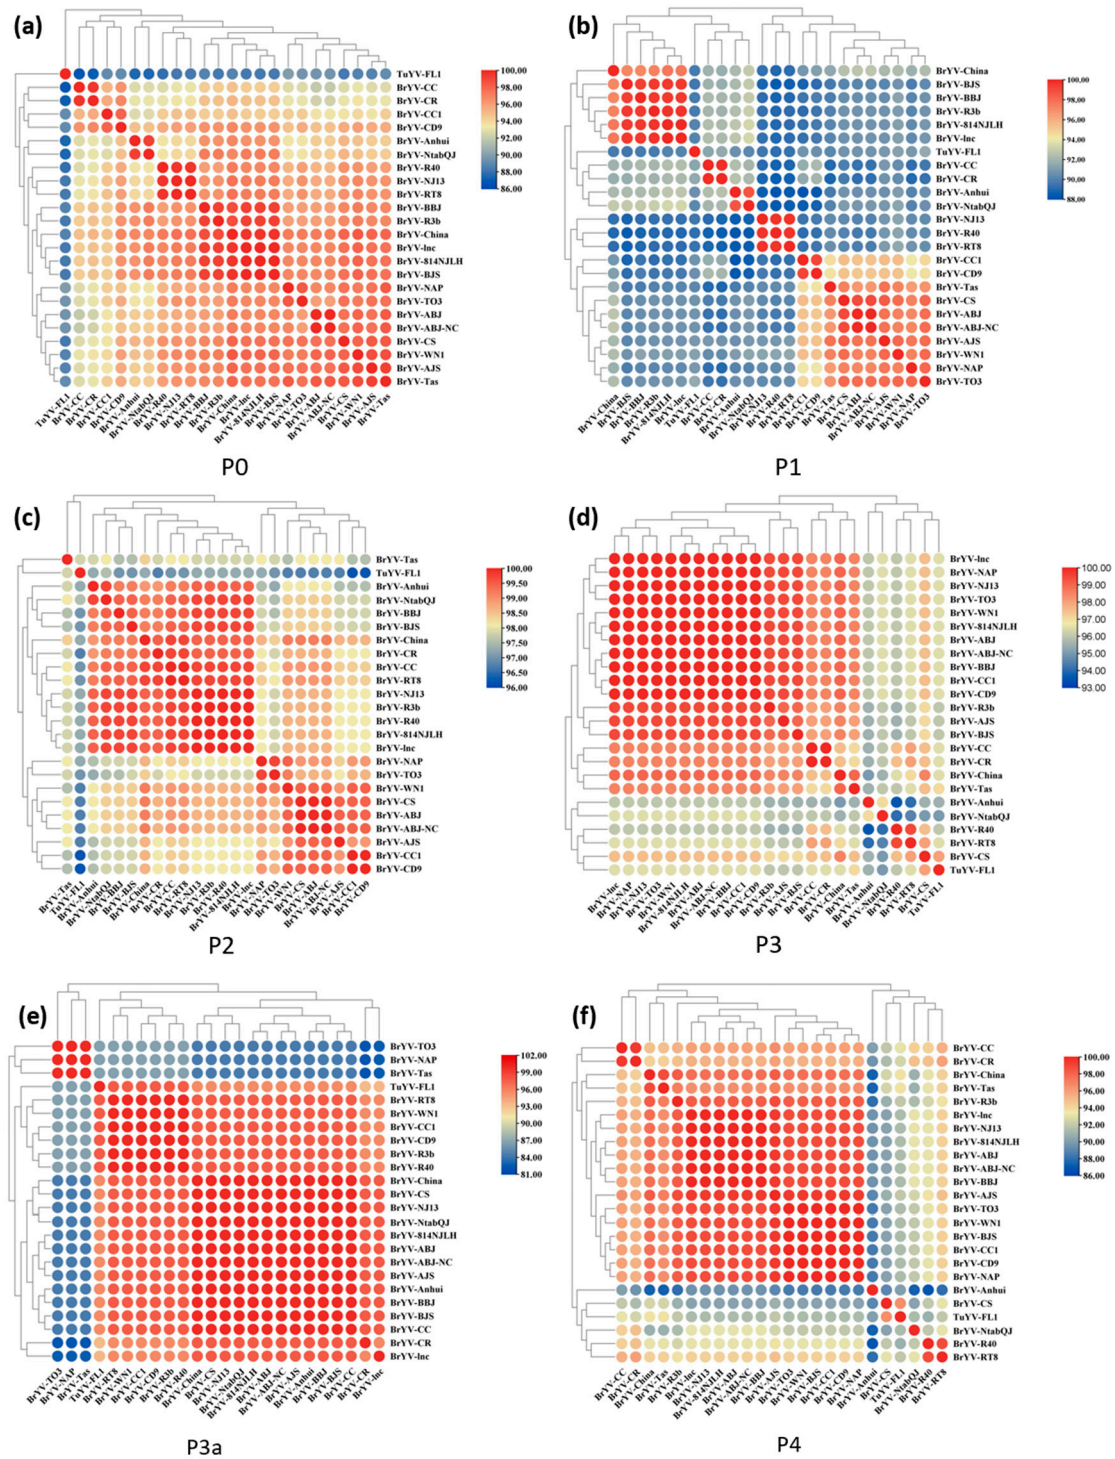

Supplementary Figure S3. Pairwise analysis of BrYV coding proteins. The matrix displayed pairwise amino acid identity among different BrYV and TuYV isolates in (a) P0 protein (RNA silencing suppressor), (b) P1 protein, (c) P2 protein, (d) P3 coat protein, (e) P3a protein and (f) P4 movement protein. All virus isolates information and GenBank accession numbers were depicted in Table S3. The phylogenetic trees based on aligned amino acid sequence of BrYV and TuYV. The identity of each amino acid pairwise was indicated by colored dot.



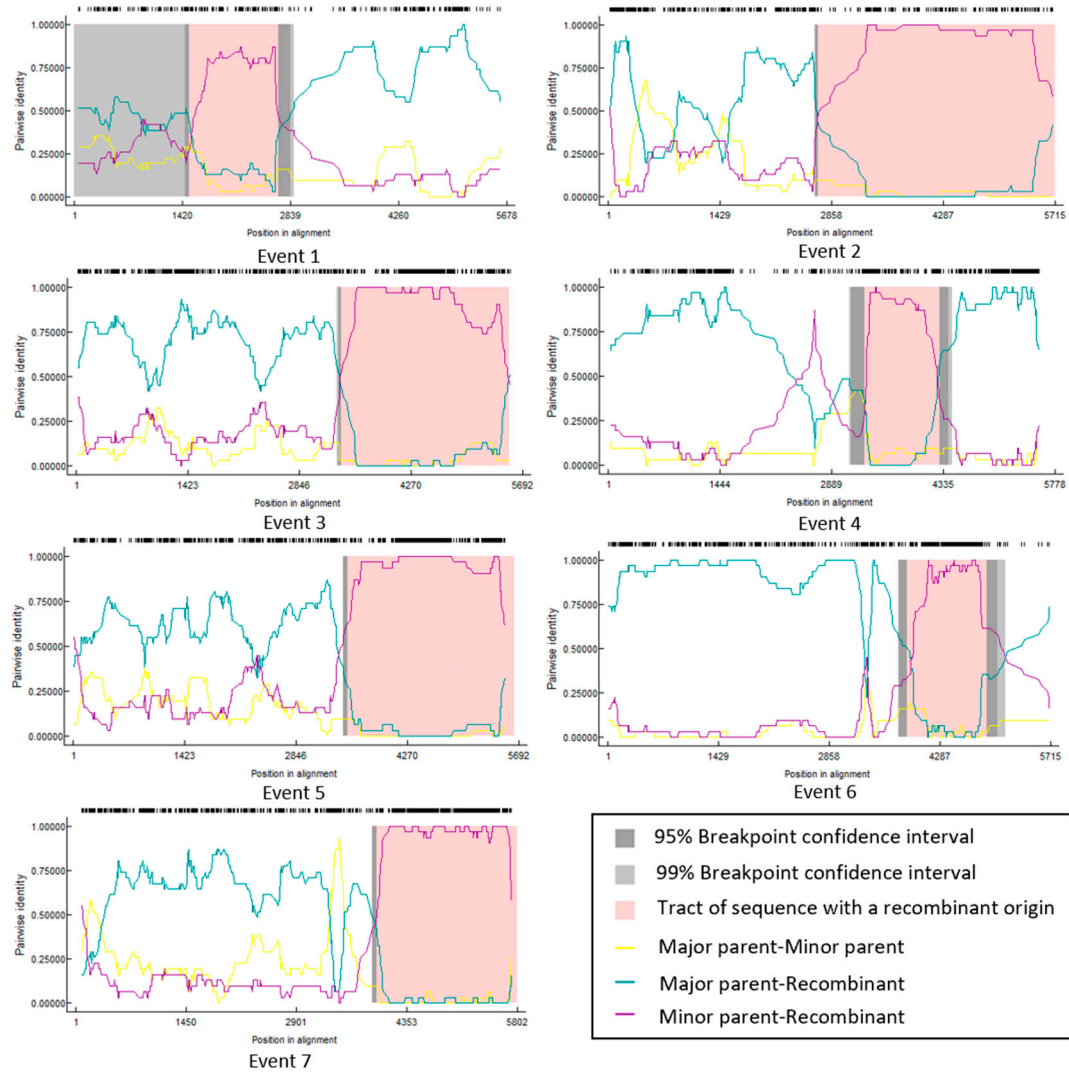

Supplementary Figure S4. The RDP method plots of 7 recombinants among BrYV and TuYV isolates. The detailed information of the seven recombinants was introduced in Table 3. For each recombinant event, the left and right boundaries of the pink area indicated the inferred recombination breakpoint locations. The dark grey and grey areas marked 95% and 99% breakpoint confidence interval, respectively. The x, y axes supplied particular location in the relevant recombinant sequence and the pairwise identity of major parent-minor parent (yellow line), major parent-recombinant (green line) and minor parent-recombinant (purple line). Vertical lines above the plot illustrated positions of the variable nucleotide sites.

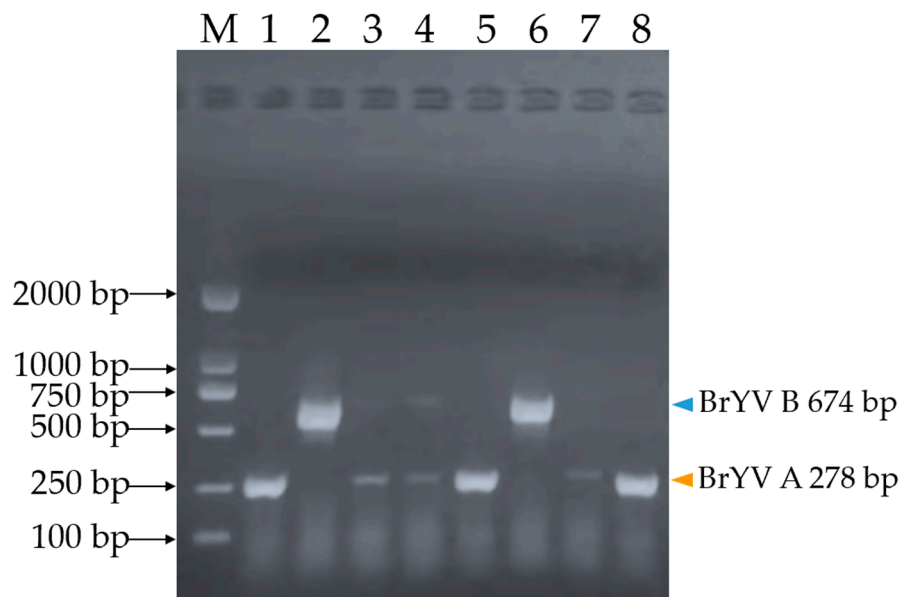

Supplementary Figure S5. The electrophoretogram of RT-PCR analysis against BrYV. Lane M: DNA marker indicated PCR products size ranging from 100 bp to 2000 bp; Lane 1 and 2 were BrYV-A and BrYV-B plasmid control, respectively; Lane 3, 4 and 5 were samples from Chuxiong in Yunnan province; Lane 6, 7 and 8 were samples from Changshun in Guizhou province. The orange triangle with the length of 278 bp suggested BrYV A test band which was amplified by primer pairs of BrYA484F and BrY761R. The blue triangle at around 674 bp indicated BrYV B test band which was detected by BrYB88F and BrY761R.
